# Supplementary material for: Slow Magnetic Relaxation and Luminescence Properties in Tetra β-Diketonate Lanthanide(III) Complexes
Source: MDPI journal article supplement (doi:10.3390/magnetochemistry9050131), 2023-05-16
Supplement: s1 [file s1]

# Slow magnetic relaxation and luminescence properties in tetra - diketonate lanthanide(III) complexes.

Saskia Speed, Ànnia Tubau, Ramon Vicente, Eva Castro and Mercè Font-Bardía.

## SUPPLEMENTARY INFORMATION

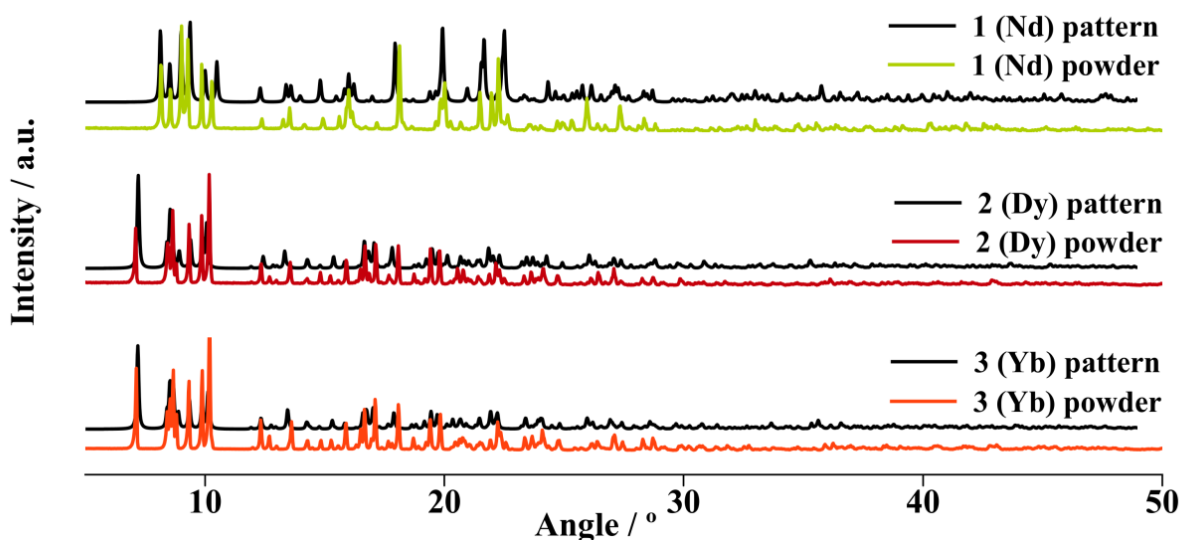

**Figure S1.** Powder X-Ray Diffraction (PDRX) of all the polycrystalline samples. The PDRX spectra of the polycrystalline samples were compared with the simulated PDRX spectra from the structures obtained by monocrystal X-Ray Diffraction.

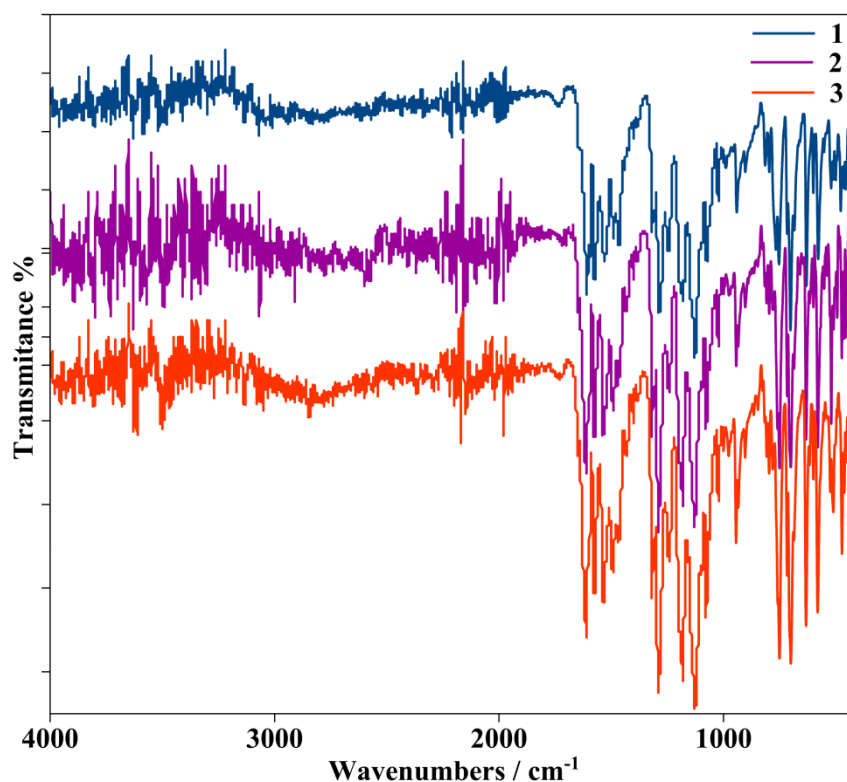

Figure S2. Infra-Red Spectra of compounds 1-3.

Table S1. Continuous shape measures (CShM's) using SHAPE software for compounds 1-3.

|         |                 | 1(Nd) |       |
|---------|-----------------|-------|-------|
| CU-8    | Oh              | 0.026 |       |
| TT-8    | T <sub>d</sub>  | 0.978 |       |
| HBPY-8  | D <sub>6h</sub> | 7.924 |       |
| TDD-8   | D <sub>2d</sub> | 7.934 |       |
|         |                 | 2(Dy) | 3(Yb) |
| TDD-8   | D <sub>2d</sub> | 0.360 | 0.422 |
| SAPR-8  | D <sub>4d</sub> | 1.666 | 1.373 |
| BTPR-8  | C <sub>2v</sub> | 2.273 | 2.040 |
| JBTPR-8 | C <sub>2v</sub> | 2.849 | 2.558 |

**Table S2.** Relaxation parameters values for the best fit of  $m''$  and  $m'$  in front of frequency using the one component generalised Debye model for compound 1.

| T (K)   | $s$ (cm <sup>3</sup> Kmol <sup>-1</sup> ) | $\tau$ (cm <sup>3</sup> Kmol <sup>-1</sup> ) | (s)        |         |
|---------|-------------------------------------------|----------------------------------------------|------------|---------|
| 1.83962 | 0.0455                                    | 0.31734                                      | 0.002      | 0.06556 |
| 1.88732 | 0.04206                                   | 0.30921                                      | 0.00152    | 0.07221 |
| 1.99563 | 0.04023                                   | 0.2931                                       | 0.00103    | 0.06035 |
| 2.09453 | 0.03677                                   | 0.27889                                      | 6.94346E-4 | 0.05252 |
| 2.19774 | 0.0362                                    | 0.27019                                      | 5.46854E-4 | 0.04596 |
| 2.3044  | 0.03318                                   | 0.25631                                      | 3.64038E-4 | 0.03809 |
| 2.40117 | 0.03119                                   | 0.24564                                      | 2.57573E-4 | 0.03385 |
| 2.50108 | 0.02977                                   | 0.23572                                      | 1.86695E-4 | 0.02777 |
| 2.59803 | 0.028                                     | 0.22687                                      | 1.36275E-4 | 0.02536 |
| 2.69581 | 0.02549                                   | 0.21874                                      | 9.79094E-5 | 0.02664 |
| 2.79577 | 0.02352                                   | 0.21116                                      | 7.18483E-5 | 0.03203 |

**Table S3.** Relaxation parameters values for the best fit of  $m''$  and  $m'$  in front of frequency using the one component generalised Debye model for compound 2.

| T (K)   | $s$ (cm <sup>3</sup> Kmol <sup>-1</sup> ) | $\tau$ (cm <sup>3</sup> Kmol <sup>-1</sup> ) | (s)        |         |
|---------|-------------------------------------------|----------------------------------------------|------------|---------|
| 1.79711 | 0.33409                                   | 6.51147                                      | 0.02539    | 0.20192 |
| 1.89644 | 0.32045                                   | 6.18647                                      | 0.02107    | 0.19353 |
| 2.00023 | 0.31244                                   | 5.86218                                      | 0.0166     | 0.17471 |
| 2.09788 | 0.30113                                   | 5.5674                                       | 0.01268    | 0.1581  |
| 2.3033  | 0.28247                                   | 5.12006                                      | 0.0073     | 0.12635 |
| 2.49529 | 0.26234                                   | 4.76426                                      | 0.00379    | 0.10196 |
| 2.69827 | 0.24811                                   | 4.45505                                      | 0.0019     | 0.08707 |
| 2.90236 | 0.23298                                   | 4.18945                                      | 9.14465E-4 | 0.08134 |
| 3.09913 | 0.22158                                   | 3.95721                                      | 4.32091E-4 | 0.08158 |
| 3.30013 | 0.17581                                   | 3.74919                                      | 2.00062E-4 | 0.08957 |
| 3.49969 | 0.08911                                   | 3.56102                                      | 9.34182E-5 | 0.09614 |
| 3.70212 | 2.95341E-18                               | 3.38881                                      | 4.49466E-5 | 0.09836 |

**Table S4.** Relaxation parameters values for the best fit of  $M''$  and  $M'$  in front of frequency using the one component generalised Debye model (Eq S1) for compound **3**.

| T (K)   | $\chi_s$ (cm <sup>3</sup> Kmol <sup>-1</sup> ) | $\chi_T$ (cm <sup>3</sup> Kmol <sup>-1</sup> ) | $\tau$ (s) | $\alpha$   |
|---------|------------------------------------------------|------------------------------------------------|------------|------------|
| 1.88843 | 0.05903                                        | 0.48819                                        | 0.00431    | 0.15698    |
| 1.99543 | 0.0559                                         | 0.48361                                        | 0.00382    | 0.1592     |
| 2.09444 | 0.05491                                        | 0.45621                                        | 0.00274    | 0.12562    |
| 2.19757 | 0.05247                                        | 0.43312                                        | 0.00193    | 0.0999     |
| 2.30387 | 0.05098                                        | 0.41924                                        | 0.00154    | 0.0849     |
| 2.40208 | 0.04806                                        | 0.39716                                        | 0.00103    | 0.06436    |
| 2.50073 | 0.04631                                        | 0.38062                                        | 7.37139E-4 | 0.04941    |
| 2.59353 | 0.04426                                        | 0.3656                                         | 5.31522E-4 | 0.04161    |
| 2.69378 | 0.04333                                        | 0.35153                                        | 3.89679E-4 | 0.0298     |
| 2.79486 | 0.04053                                        | 0.33902                                        | 2.88188E-4 | 0.02637    |
| 2.89796 | 0.03978                                        | 0.32734                                        | 2.16683E-4 | 0.02048    |
| 2.99848 | 0.03938                                        | 0.3166                                         | 1.64892E-4 | 0.01455    |
| 3.09816 | 0.0398                                         | 0.30641                                        | 1.27739E-4 | 0.01174    |
| 3.19864 | 0.04065                                        | 0.29721                                        | 1.0025E-4  | 0.00895    |
| 3.30053 | 0.04398                                        | 0.28806                                        | 8.02924E-5 | 6.91582E-5 |
| 3.39966 | 0.04593                                        | 0.27992                                        | 6.349E-5   | 9.47705E-5 |

$$\chi_{AC}(\omega) = \chi_s + \frac{\chi_T - \chi_s}{1 + (i\omega\tau)^{1-\alpha}} \quad \text{Eq S1}$$

Generalized Debye model that describes a system with a distribution of the magnetization relaxation time. Where  $\chi_s$  and  $\chi_T$  are the adiabatic and thermal susceptibilities,  $\tau$  is the relaxation of the magnetization time and  $\omega$  is the angular frequency of the ac field ( $\omega = 1/2\pi f$ ).  $\chi_T$  is the susceptibility in the limit of the lowest field frequencies where the thermal equilibrium of the system is observed.  $\chi_s$  (lower than the  $\chi_T$ ) is observed when the oscillations of the ac field are fast compared to the time constant,  $\tau$ , and the magnetic system remains isolated from its environment. The  $\alpha$  parameter quantifies the width of the  $\tau$  distribution and it ranges from 0 to 1. The wider the distribution,  $\alpha$  acquires a larger value.
